# Supplementary material for: Silencing of hepatic fate-conversion factors induce tumorigenesis in reprogrammed hepatic progenitor-like cells
Source: PubMed Central journal article supplement (PMC4962402; doi:10.1186/s13287-016-0349-5), 2016-07-27
Supplement: 13287_2016_349_MOESM1_ESM.pdf [file 13287_2016_349_MOESM1_ESM.pdf]

**A**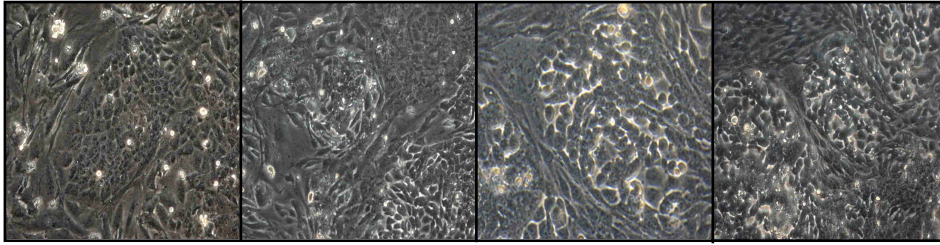**B**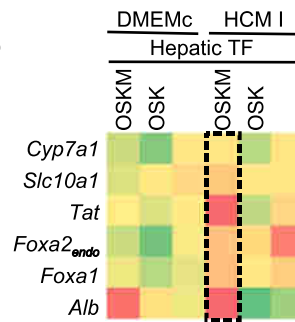

SUPPLEMENTARY FIGURE S1  
(Serrano et al)

**A**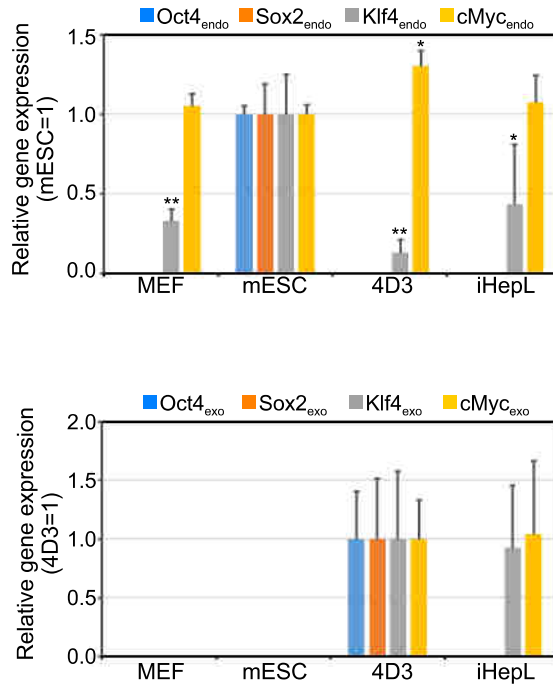**B**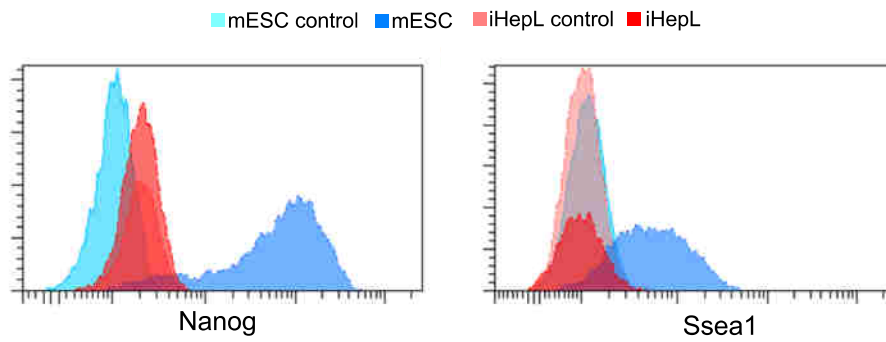

SUPPLEMENTARY FIGURE S2  
(Serrano et al)

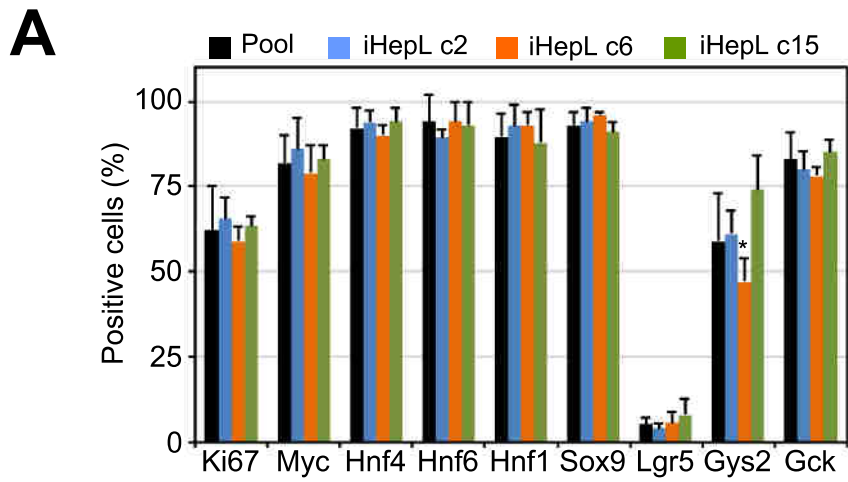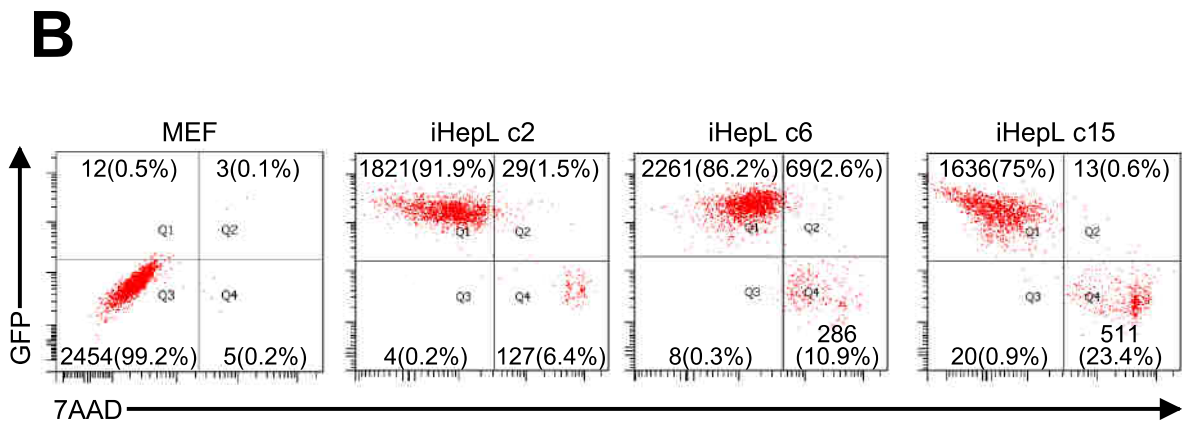

SUPPLEMENTARY FIGURE S3  
(Serrano et al)

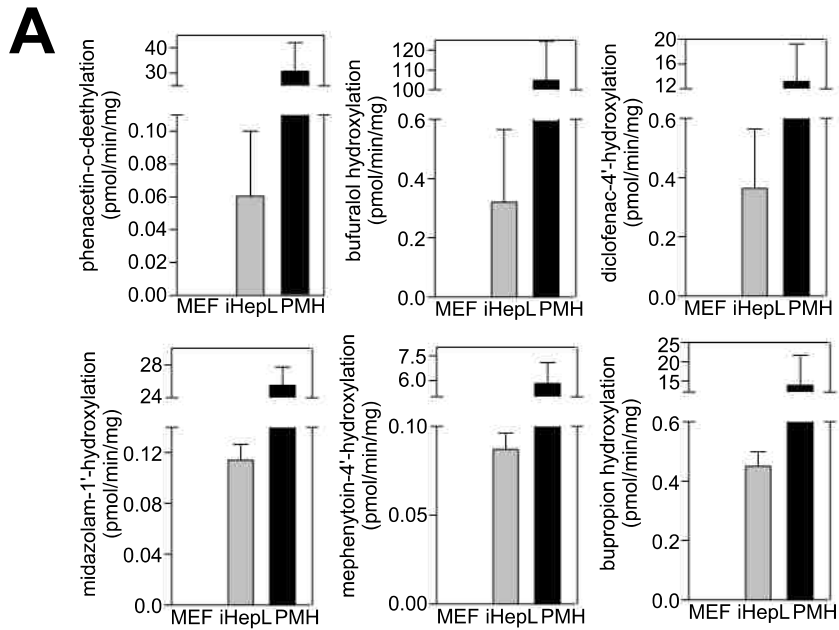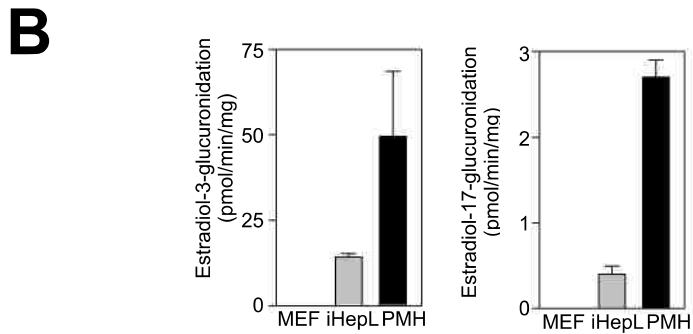

SUPPLEMENTARY FIGURE S4  
(Serrano et al)

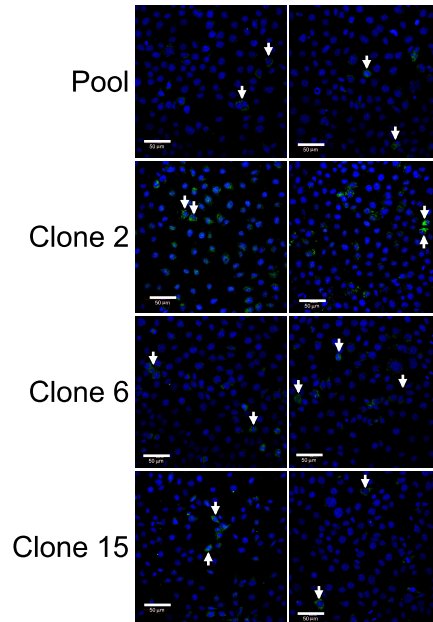

SUPPLEMENTARY FIGURE S5  
(Serrano et al)

**A**

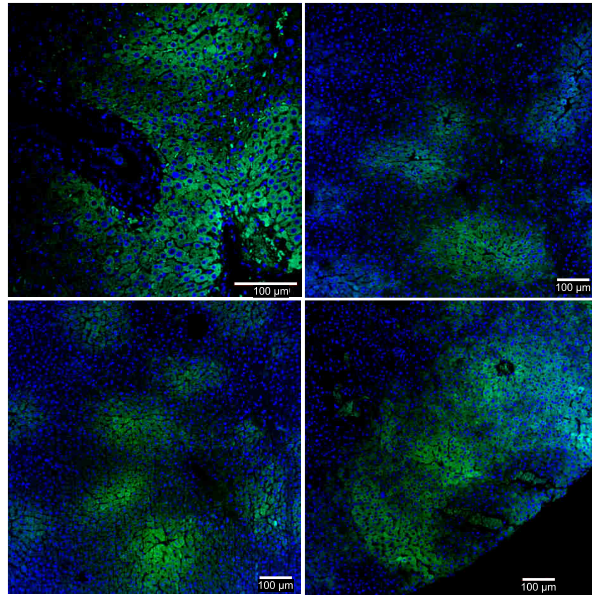

**B**

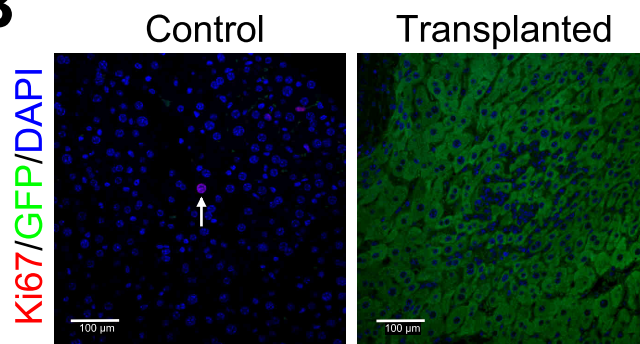

SUPPLEMENTARY FIGURE S6  
(Serrano et al)

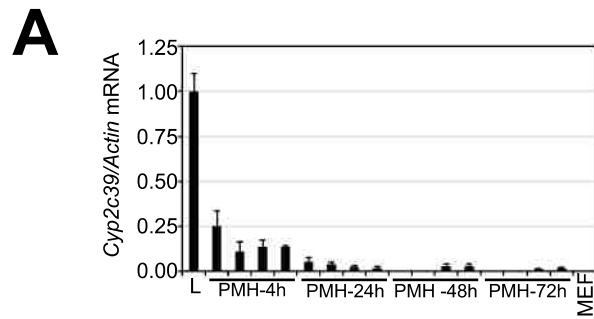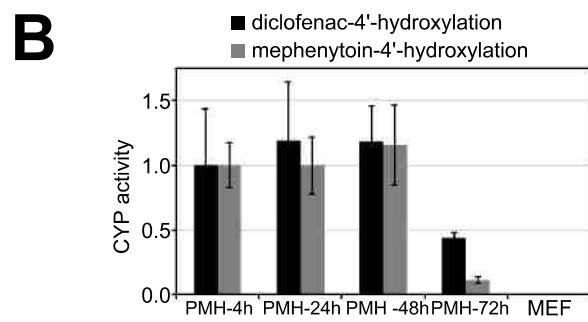

SUPPLEMENTARY FIGURE S7  
(Serrano et al)

**Supplementary Figure S1. Formation of epithelial colonies in infected MEF.** **A.** Phase contrast photographs of several epithelial colonies (7 days after infection) formed in MEF infected with the retroviral mixture. **B.** Heat map depicting relative expression levels of the mRNAs analyzed in Figure 1B. Red: higher expression; green: lower expression.

**Supplementary Figure S2. iHepL cells do not express endogenous pluripotency factors Oct4 and Sox2.** **A.** Expression levels of endogenous and exogenous (transgenic) transcripts for Oct4, Klf4, Sox2 and c-Myc were measured by qRT-PCR in total RNA extracted from MEF, mESC (CGR8 strain), iHepL and 4D3 (MEF infected with lentiviral vectors expressing OSKM for 3 days) cells. Data is represented as mean  $\pm$  s.d. from MEF (n=3), mESC (n=3), iHepL cells (n=6) and 4D3 (n=3). Student's t test was performed between mESC (upper panel) or 4D3 (lower panel) and the other groups; \* p<0.05; \*\*p<0.01. **B.** Expression of Nanog and Ssea1 in mESC (CGR8 strain) and iHepL analyzed by flow cytometry. Controls were incubated with normal serum instead of the primary antibody.

**Supplementary Figure S3. Characterization of iHepL isolated clones.** **A.** Original unselected pool of iHepL cells and isolated clones from three different infections (see below) were immunostained as shown in Figure 3. The percentage of positive cells was calculated using the CellC software {Selinummi, 2005 #551} and high content screening imaging station Scan<sup>R</sup> from Olympus. Total cell number ranged from 1000 to 4000. Total cell numbers were estimated with DAPI staining. No statistically significant difference was found between the pool and any of the clones except for Gys2 immunostaining in clones 6 and 15, p<0.05. **B.** Cells (MEF and iHepL clones) were incubated for 30 min in media containing 50  $\mu$ g/ml of 7-amino actinomycin D (7-AAD) and analyzed for viability (7AAD-negative) and GFP expression by FACSCanto Flow Cytometer (Becton Dickinson). FACSCanto. iHepL c2: clone 2 from infection #1, iHepL c6: clone 6 from infection #2 and iHepL c15: clone 15 from infection #3.



**Supplementary Figure S4. Limited Cyp450 activities in iHepL cells.** **A.** Cells were incubated with a mixture of 8 substrates and the corresponding metabolites measured by LC-MS. Formation of 6-hydroxychlorzoxazone and 7-hydroxycoumarin were not detected. **B.** Formation of estradiol-3-glucuronide (Ugt1a1) and estradiol-17-glucuronide (Ugt2b) in iHepL incubated with estradiol. Data is represented as mean  $\pm$  s.d. from iHepL cells (n=6) and PMH (n=3). Student's t test was performed and statistical significance was in all cases  $p < 0.001$ .

**Supplementary Figure S5. Expression of hepatic progenitor marker Lgr5 in pool iHepL and isolated clones.** Representative fluorescence images of iHepL cells immunostained with an antibody against Lgr5. Two images per cell type are shown. Nuclei were made visible with DAPI.

**Supplementary Figure S6. iHepL cells (GFP-positive) engraftment in mouse livers.** **A.** Low magnification representative fluorescent images showing engraftment of iHepL cells in the mouse liver after three weeks. **B.** Serial sections of transplanted livers were stained by Ki67. Only sporadic positive cells (arrow in control) were detected among resident and transplanted cells. Nuclei were made visible with DAPI.

**Supplementary Figure S7. mRNA and activity decay in cultured hepatocytes.** **A.** Total RNA was extracted from cultured primary mouse hepatocytes (PMH) at the indicated times and the expression of *Cyp2c39* was assessed by qPCR and represented as relative gene expression normalized to total mouse liver (L). Data are represented as mean  $\pm$  s.d. (L, n=5; MEF, n=3; PMH, n=4). **B.** Graph showing Cyp450 activity in PMH. Diclofenac and mephenytoin 4 hydroxylation by primary cultured mouse hepatocytes (n=4) at different culture times. Cells were incubated with a diclofenac and mephenytoin and the corresponding metabolites measured by LC-MS.

**Supplementary Table S1. Primers used for cloning**

| Primer               | Sequence 5'-3'                   |
|----------------------|----------------------------------|
| pMIGR1-Hhex-XhoI-F   | AACTCGAGATGCAGTTCCCGCACCCGGGG    |
| pMIGR1-Hhex-EcoRI-R  | GGGAATTCTCATCCAGCATTAAAGTAGCC    |
| pMIGR1-Hnf1a-XhoI-F  | AACTCGAGACCATGGTTTCTAAACTGAGCCAG |
| pMIGR1-Hnf1a-EcoRI-R | GGGAATTCTTACTGGGAGGAAGAGGCCAT    |
| pMIGR1-Hnf6a-XhoI-F  | AACTCGAGACCATGAACGCGCAGCTGACCATG |
| pMIGR1-Hnf6a-EcoRI-R | GGGAATTCTCATGCTTTGGTACAAGTGC     |

**Supplementary Table S2. Retroviral plasmids used in this study.**

| Plasmid      | Backbone       | Developed by       | Addgene |
|--------------|----------------|--------------------|---------|
| pMSx-Oct4    | pMXs           | Dr Shinya Yamanaka | #13366  |
| pMXs-Sox2    | pMXs           | Dr Shinya Yamanaka | #13367  |
| pMXs-Klf4    | pMXs           | Dr Shinya Yamanaka | #13370  |
| pMXs-cMyc    | pMXs           | Dr Shinya Yamanaka | #13375  |
| pBabe-Foxa2  | pBabe-PURO     | Dr Ken Zaret       |         |
| pBabe-Gata4  | pBabe-PURO     | Dr Ken Zaret       |         |
| pBabe-Foxa2  | pBabe-PURO     | Dr Ken Zaret       |         |
| pMIGR1-Hhex  | pMIGR1-IRESGFP | In house           |         |
| pMIGR1-Hnf1a | pMIGR1-IRESGFP | In house           |         |
| pMIGR1-Hnf6a | pMIGR1-IRESGFP | In house           |         |

**Supplementary Table S3. Primers used for qRT-PCR**

| Transcript            | Forward (5'-3')             | Reverse (5'-3')                  | Size (bp) |
|-----------------------|-----------------------------|----------------------------------|-----------|
| Albumin               | gcatgggcagtagctcgct         | ggcaaggtccgcctgtcat              | 150       |
| Slc10a1               | tggtacctctcctgatgcc         | cctgttccatgctgatggtgct           | 108       |
| Cyp7a1                | caacgggttgattccatacc        | attccccatcagttgcag               | 118       |
| Foxa1                 | acgaggagccccatcgagcc        | accaggtggccatgcagaca             | 124       |
| Foxa2 <sub>endo</sub> | cgaacaagcgggctggat          | cctctattccctgtcccagct            | 142       |
| Foxa3                 | ctctattcccgtctctgctt        | ggcagttaccacagtagccaa            | 179       |
| Cebp                  | ccatgccgggagaactctaac       | tggaggtgactgctcatcgg             | 86        |
| Hhex <sub>endo</sub>  | cccagcctctcaggaagacccc      | gtccggtctctaaacatggccga          | 125       |
| Hnf4a <sub>endo</sub> | tgaatcctacaagctcctgcc       | taggttactcccaggtgctct            | 164       |
| Oct4 <sub>endo</sub>  | gtggacctcaggttgactgg        | ttctgcagggcttcatgcc              | 199       |
| Sox2 <sub>endo</sub>  | tagagctagactccggcgatga      | ttgcttaacaagaccagaaa             | 296       |
| Klf4 <sub>endo</sub>  | ccaactgaacatcccggactt       | tctgcttaaaggcactatggga           | 498       |
| cMyc <sub>endo</sub>  | tgacctaacctgaggagagctggaatc | aagtttgaggcagttaaaattatggctgaagc | 142       |
| Oct4 <sub>exo</sub>   | ttgggctagagaaggtatgtggtc    | ttatcgtcgaccactgtgctg            | 421       |
| Sox2 <sub>exo</sub>   | ggttacctctctcccactccag      | ttatcgtcgaccactgtgctg            | 376       |
| Klf4 <sub>exo</sub>   | gcgaactcacacaggcgagaacc     | ttatcgtcgaccactgtgctg            | 406       |
| cMyc <sub>exo</sub>   | cagaggaggaacgagctgaagcgc    | ttatcgtcgaccactgtgctg            | 426       |
| Afp                   | gttgccaaggaaactcgtg         | ggtttgacgccattctctgc             | 163       |

|         |                          |                          |     |
|---------|--------------------------|--------------------------|-----|
| MaoB    | acctagcaagcagcatgagc     | gtaagtcctgcctctacacg     | 146 |
| Fmo1    | ttaccaccgccaagtgtcat     | gatgctcagagccagtcgtg     | 195 |
| Nat2    | cccgggtgcagtcctggtag     | tagcccgtatctggctgta      | 132 |
| Cyp1a2  | cccctgccctcagtggtaca     | agcacgtccccatactgctg     | 246 |
| Cyp2e1  | gacgtgcggaggtttccct      | ttcaggggtgcacagccaat     | 164 |
| Cyp2c39 | ggccagtgatgcctgatcacaat  | aatcgggaaaggagtggggc     | 159 |
| Cyp3a11 | acctgggtgctcctagcaat     | acagcaaggagaggcgtttgac   | 221 |
| Ugt1a1  | tgggaggctgttagtgtccc     | accacgcgcagcagaaaaga     | 249 |
| Tat     | acctcaatcccaccca         | tcccactggataggtag        | 205 |
| Aat1    | atcccccttggtcccat        | ttcagcttgcctccagag       | 96  |
| Otc     | gctgcgtcgtactggacatt     | gcttctggagcacaggtgag     | 175 |
| Cdh1    | aacaactgcataagggcgggaatc | cctgtgcagctggctcaaatcaaa | 246 |
| Ocln    | cctccaatggcaaagtgaatggca | tgtttcatagtgtcagggtccgt  | 227 |
| Snai1   | ttgtgtcgcacgacctgggaaa   | tcttcacatccagtggtttgga   | 167 |
| Zeb1    | tgctcactgcccgtattgtgata  | agtgcactgaactgcggttcc    | 224 |
| Thy1    | accgagcacacgtaccgct      | tgccccacactgaccagc       | 190 |
| Nanog   | ccactagggaaagccatgctgc   | aggaacctggctttgccctgac   | 135 |
| Lin28   | ggagtgagcggcgccaaaa      | gctggggtggcagctgcat      | 116 |
| Ggt1    | ttgcctatccaagaggacc      | ctgggtgggtggtttcatca     | 132 |
| Slc51a  | tggccatcctttccgtaaa      | agcgaacaagcctcataccc     | 286 |
| Krt19   | gtgccaccattgacaactcc     | aatccactccacactgacc      | 287 |
| Spp1    | agccacaagtccacagcca      | aggaactgtgttttgcctct     | 147 |
| Aqp5    | gtcacactgggcatctgt       | cgatcggtcctaccagaag      | 130 |
| CD24a   | ttcgcagtgtcacacactga     | acacacacagtagcttcggg     | 124 |
| Cftr    | ttgcccgatcagttctcag      | gcctgaaggagctgtactg      | 221 |
| Actin   | ccaccatgtaccaggcatt      | agggtgtaaacgcagctca      | 250 |

**Supplementary Table S4. Primers used for genomic qPCR**

| Transcript           | In plasmid              | Forward (5'-3')      | Reverse (5'-3')      | Size (bp) |
|----------------------|-------------------------|----------------------|----------------------|-----------|
| Cnd1 <sub>In1</sub>  |                         | tggattggaggaacctgctc | cctgagtcctctgctgaac  | 85        |
| Cnd1 <sub>In2</sub>  |                         | atcctgtaggccaggtgatg | aggctcaagggttttaagg  | 81        |
| GFP                  | pMIGR1-IRES-GFP derived | tatatcatggccgacaagca | gttgtggcggatctgaagt  | 60        |
| Hnf1 <sub>exo</sub>  | pMIGR1-Hnf1a-IRES-GFP   | atggcctctctcccagta   | acaccgcccttattccaag  | 80        |
| Hnf6a <sub>exo</sub> | pMIGR1-Hnf6a-IRES-GFP   | tcaagcactgtaccaagca  | accgcccttattccaagc   | 81        |
| Hhex <sub>exo</sub>  | pMIGR1-Hhex-IRES-GFP    | tcgagggggataaaggctac | acaccgcccttattccaag  | 94        |
| Oct4 <sub>exo</sub>  | pMXs-Oct4               | gtggtgttacgggaaatcac | cgaagtctgaagccaggtgt | 82        |
| Sox2 <sub>exo</sub>  | pMXs-Sox2               | gtggtgttacgggaaatcac | ttcagctccgtctccatca  | 71        |
| Klf4 <sub>exo</sub>  | pMXs-Klf4               | gtggtgttacgggaaatcac | gctggacgcagctgtcttct | 146       |
| cMy <sub>cexo</sub>  | pMXs-cMyc               | gtggtgttacgggaaatcac | agggtgtacggagctcgtag | 127       |

**Supplementary Table S5. Antibodies used in this study.**

| Antibody    | Raised in | Dilution | Reference                         | Use     |
|-------------|-----------|----------|-----------------------------------|---------|
| Albumin     | Mouse     | 1/100    | AB1455; Merck Millipore           | IC, IHC |
| Ck17-19     | Rabbit    | 1/50     | 12434; Cell Signalling Technology | IC, IHC |
| E-cadherin  | Rabbit    | 1/500    | 3195; Cell Signalling Technology  | IC, IHC |
| GFP         | Goat      | 1/200    | Ab6673; Abcam                     | IC, IHC |
| Glucokinase | Rabbit    | 1/50     | Orb38697; Biorbyt                 | IC, IHC |
| Haptoglobin | Rabbit    | 1/50     | Orb28600; Biorbyt                 | IHC     |
| Gys2        | Rabbit    | 1/250    | HPA039482; Sigma                  | IC      |
| Hnf1        | Rabbit    | 1/200    | 8986; Santa Cruz Biotechnology    | IC, IHC |
| Hnf1        | Goat      | 1/200    | 6547; Santa Cruz Biotechnology    | IC, IHC |
| Hnf4        | Goat      | 1/200    | 6556; Santa Cruz Biotechnology    | IC, IHC |
| Hnf6        | Rabbit    | 1/200    | 13050; Santa Cruz Biotechnology   | IC      |
| Ki67        | Rabbit    | 1/200    | 9106; Thermo Scientific           | IC, IHC |
| Lgr5        | Rabbit    | 1/50     | Ab75732; Abcam                    | IC      |
| Myc         | Rabbit    | 1/200    | Ab32072; Abcam                    | IC, IHC |
| Nanog       | Rabbit    | 1/100    | REC-RCAB0001P; Cosmo Bio Ltd      | IC, FC  |
| Oct4        | Rabbit    | 1/400    | 2840; Cell Signalling Technology  | IC, FC  |
| pH3         | Rabbit    | 1/200    | 9701S; Cell Signalling Technology | IC, IHC |
| Sox9        | Rabbit    | 1/100    | AB5535; Merck Millipore           | IC, IHC |
| Ssea1       | Mouse     | 1/100    | 4744; Cell Signalling Technology  | IC, FC  |
| Ugt1a1      | Rabbit    | 1/750    | AV44294; Sigma                    | IC      |

**Supplementary Table S6. Statistical significance of relative transgene copy number.** The following table shows the statistical significance calculated by unpaired Student's t-test between iHepL cells and each of the samples included in Figure 6D. A fragment of intron 2 from Ccnd1 gene was used as a secondary normalization control.

|                | TARGET GENES         |              |                      |                     |                     |                     |                     |                    |
|----------------|----------------------|--------------|----------------------|---------------------|---------------------|---------------------|---------------------|--------------------|
|                | Ccnd1 <sub>in2</sub> | GFP          | Hnf1a <sub>exo</sub> | Hhex <sub>exo</sub> | Oct4 <sub>exo</sub> | Sox2 <sub>exo</sub> | Klf4 <sub>exo</sub> | Myc <sub>exo</sub> |
| <b>T1874</b>   | 0.149                | 0.528        | 0.059                | 0.445               | N.D.                | N.D.                | 0.102               | <u>0.000</u>       |
| <b>T1875</b>   | 0.188                | 0.102        | <u>0.001</u>         | 0.386               | N.D.                | N.D.                | <u>0.019</u>        | <u>0.001</u>       |
| <b>T1878</b>   | <u>0.010</u>         | <u>0.038</u> | <u>0.006</u>         | 0.144               | N.D.                | N.D.                | 0.297               | <u>0.001</u>       |
| <b>T1881</b>   | <u>0.005</u>         | 0.203        | <u>0.000</u>         | 0.778               | N.D.                | N.D.                | 0.687               | <u>0.000</u>       |
| <b>Control</b> | 0.065                | N.D.         | N.D.                 | N.D.                | N.D.                | N.D.                | N.D.                | N.D.               |

N.D: not detected
